# Supplementary material for: Nationwide evaluation of the advanced clinical practitioner role in England: a cross-sectional survey
Source: HighWire-hosted journal article supplement (doi:10.1136/bmjopen-2021-055475), 2022-01-01
Supplement: bmjopen-2021-055475supp003_data_supplement.pdf [file bmjopen-2021-055475supp003_data_supplement.pdf]

18-090780-01 Primary Care Questionnaire 5 – Version 14

### Questionnaire 5 – Primary Care

Version 14 30.07.19

Thank you for taking the time to complete this survey about advanced clinical practice which is part of a wider piece of work being undertaken by HEE along with NHSE and NHSi and being conducted by Ipsos MORI.

Those working at advanced clinical practice level play a critical role in enhancing capacity and capability within multi professional teams, and come from a range of professional backgrounds such as nursing, midwifery, allied health professionals, and pharmacy (job titles may include Extended Scope Practitioners in Physiotherapy, OT, Pharmacy; Podiatry Practitioners, Advanced Nurse Practitioners, and some Clinical Nurse Specialists as well as many others). They are healthcare professionals educated to Masters level and have developed the skills and knowledge to allow them to take on expanded roles and scope of practice caring for patients. It is anticipated that the role of advanced practice staff will continue to develop and increase in importance over the coming years.

To help develop and improve their policies relating to advanced clinical practice, Health Education England is keen to understand the training and roles that advanced clinical staff are currently undertaking in your organisation, your workforce strategy, the support and training advanced practice staff are offered, and the governance structures underpinning it all.

For more information, a link to Health Education England's multi-professional framework for advanced clinical practice in England (2017) can be found [here](#).

We have also produced a short webinar about the purpose of this research, which can be found [here](#). This may help with completing the survey.

#### NEXT BUTTON

#### Privacy Notice

#### How your data will be used

Health Education England have invited you to take part in this survey, and as a potential participant it's important that you are informed on how your personal data will be used and your rights under GDPR.

To process your data Ipsos MORI ("the processor") and Health Education England ("the controller") require a legal basis to do so. For this survey the legal basis for the processing of your personal data is your consent.

Responding to this survey is entirely voluntary and you can choose to withdraw your consent at any time. If you would like to withdraw your consent at any point please contact [healtheducationacp@ipsos.com](mailto:healtheducationacp@ipsos.com) or call Ipsos MORI on Freephone 0800 141 3657.

You also have the right to object to, or restrict the processing of your personal data at any time. To do so please email [gdpr@hee.nhs.uk](mailto:gdpr@hee.nhs.uk).

The personal data which may be collected in this survey includes your name, email address and job title. However, you do not need to provide this information if you do not wish to and there are answer options in the survey that will allow you to remain anonymous.

## 18-090780-01 Primary Care Questionnaire 5 – Version 14

Data from this survey may be reported at various levels including organisation/trust level, STP/ICS level and by profession and speciality. Some verbatim answers submitted as part of this survey will also be passed on to HEE for their own analysis purposes. However, no personal data or information submitted as part of this survey will be passed on to your employer.

Data collected through this survey will be retained for 3 months with personal data held for up to 12 months after completion of the research and will be deleted via secure methods. For more information on your rights please see Health Education England's privacy notice [here](#).

Toward the end of the survey you will also be asked if you consent to taking part in further research and other work on advance clinical practice. If you choose to do so, your personal data will be shared with Health Education England and this information will be held for up to 12 months.

**NEXT BUTTON****How to complete this survey**

**We only require one response per practice**, please liaise with colleagues and organisation leads before completing this survey to avoid duplication.

**You may also wish to download a PDF version of the questionnaire**, available [here](#) to share with others in your organisation to help you gather their views and staff numbers, before you respond to the survey online.

Please note that the answers that you provide on behalf of your practice may be shared with Health Education England so they can understand what is happening at a local level. You won't personally be identified in the data unless you choose to provide information which could identify you.

Depending on the extent of your comments, this questionnaire should only take around **15 minutes** to complete.

**Please note, your answers will only be saved once you have completed and submitted the survey. However, if you would like to save your progress and submit your answers later, please tick the box below to provide your email address.** We will then send you a unique link to the survey which will allow you to access your answers and pick up where you left off. We will only use this email address to send you the unique link and this will not be shared with Health Education England or any other organisation.

**If you are happy to do so please select "I would like to provide an email address". EMAIL ADDRESS BOX.**

**1. I would like to provide an email address.**

If you need to change any of your answers, please use the back button to go back and change previous responses.

If you need help completing this survey, please let us know by emailing [healtheducationacp@ipsos.com](mailto:healtheducationacp@ipsos.com) or calling Ipsos MORI on Freephone 0800 141 3657.

**CONSENT BUTTON:** I agree to participate in the survey and provide data about advanced clinical practice and understand that participation is voluntary and I can change my mind at any time.

By clicking the button, you agree to participate in the survey about advanced clinical practice and understand that participation is voluntary and you can change your mind at any time.

18-090780-01 Primary Care Questionnaire 5 – Version 14

### **Organisation information**

The first few questions are about the practice that you work in.

#### **ASK ALL**

**Q1 Which STP/ICS does your practice fall under? Please choose from the following list.**

#### **SINGLE CODE**

CHOOSE FROM DATABASE. ADD INSTRUCTIONS FOR SEARCHING.

1. Other – please write in (SPECIFY)

#### **ASK ALL**

**Q2 Please state which training hub your practice falls under? This may previously have been referred to as CEPN/CPEN.**

OPEN ENDED

1. Don't know

#### **ASK ALL**

**Q3 What is your job role?**

#### **MULTICODE**

1. Practice manager
2. Practice administrator
3. GP within the practice
4. Other health care professional within the practice – please write in (SPECIFY)
5. Other - please write in. (SPECIFY)
6. Don't know

#### **ASK ALL**

**Q4 Before today, how much, if anything, would you say you personally know about Health Education England's multi-professional advanced clinical practice framework?**

#### **SINGLE CODE**

1. A great deal
2. A fair amount
3. Just a little
4. Heard of, but know nothing about
5. Never heard of
6. Don't know

#### **IF CODES 3 TO 6 AT Q4 SHOW THE FOLLOWING INFORMATION**

The following questions link to the HEE advanced clinical practice framework. You can find the framework [here](#).

#### **Definition of advanced clinical practice:**

“Advanced clinical practice is delivered by experienced, registered health and care practitioners. It is a level of practice characterised by a high degree of autonomy and complex decision making. This is underpinned by a master's level award or equivalent that encompasses the four pillars of clinical

## 18-090780-01 Primary Care Questionnaire 5 – Version 14

practice, leadership and management, education and research, with demonstration of core capabilities and area specific clinical competence.

Advanced clinical practice embodies the ability to manage clinical care in partnership with individuals, families and carers. It includes the analysis and synthesis of complex problems across a range of settings, enabling innovative solutions to enhance people's experience and improve outcomes."

**The four pillars (taken from the multi-professional advanced clinical practice framework):**

This framework requires that health and care professionals working at the level of advanced clinical practice should have developed and can evidence the underpinning competencies applicable to the specialty or subject area, i.e. the knowledge, skills and behaviours relevant to the health and care professional's setting and job role. The core capabilities **across the four pillars...**

- Clinical practice
- Leadership and management
- Education
- Research

...are then applied to these specialist competencies. These may be manifested/demonstrated in different ways depending on the profession, role, population group, setting and sector in which an individual is practising.

**ASK ALL**

**Q5 Have those in your workforce who are working at advanced practice level been mapped against HEE's multi-professional advanced clinical practice framework?**

**When answering this question please think about those who are qualified advanced clinical practitioners or consultants. This may include nurses, midwives, health scientists, pharmacists, allied healthcare professionals and psychological professions.**

**SINGLE CODE**

1. All staff have
2. Some staff have
3. Hardly any staff have
4. None have
5. Don't know

**ASK ALL**

**Q6 Does your practice have staff working at advanced clinical practice level, in any of the following professions? Please include staff that you employ directly and staff that provide services to your practice/network. For example, please include staff from private organisations commissioned to provide NHS services or staff from any Community Interest Companies (CICs).**

**MULTICODE**

1. Nurses
2. Midwives
3. Pharmacists
4. Physiotherapists

## 18-090780-01 Primary Care Questionnaire 5 – Version 14

5. Paramedics
6. Other allied healthcare professionals
  - a) Art Therapists
  - b) Drama Therapists
  - c) Music Therapists
  - d) Podiatrists
  - e) Dietitians
  - f) Occupational Therapists
  - g) Operating Department Practitioners
  - h) Orthoptists
  - i) Osteopaths
  - j) Prosthetist and orthotists
  - k) Radiographer – Diagnostics
  - l) Radiographer – Therapeutics
  - m) Speech and language therapists
7. Psychological professionals (including both statutory and non-statutory regulated)
8. Healthcare scientist
9. Other professions – please write in (SPECIFY)
10. In none of these professions – CLOSE QUESTIONNAIRE
11. Don't know

**ASK ALL WHO CODED 1-10 AT Q6 (I.E. WHO HAVE ADVANCED CLINICAL PRACTITIONERS WORKING IN EACH OF THE PROFESSIONS)**

**LOOP: PLEASE ASK FOR EACH PROFESSION SELECTED AT Q6.**

**Q6B You previously stated that your organisation has staff working at advanced clinical practice level in the following professions <<ENTER LIST FROM Q6>>**

**Please select the specialities <<INSERT CODE SELECTED AT Q6>> work in within your organisation. REPEAT QUESTION FOR EACH CODE SELECTED AT Q6.**

**MULTICODE**

1. GP nursing
2. Musculoskeletal Services (e.g. physio)
3. Paramedic Services
4. Other – please write in (SPECIFY)
5. Non-specific specialties
6. None of these (SINGLE CODE)
7. Don't know (SINGLE CODE)

**ASK IF CODED 1-9AT Q6 (profession), CODED 1-5 AT Q6B (speciality).**

**LOOP: PLEASE ASK Q7 FOR EACH CODE SELECTED AT Q6.**

**Q7 How many <<<INSERT CODE SELECTED AT Q6>>> does your practice have working at advanced clinical practice level for each of the following specialities?**

**Please record both the actual number of staff and the whole time equivalents. If you are unsure, please give your best estimate.**

**BRING FORWARD LIST OF SPECIALITIES SELECTED AT Q6B.**

1. Trainee advanced level practitioner – RECORD NUMBER
  - a. Number of staff headcount

## 18-090780-01 Primary Care Questionnaire 5 – Version 14

- b. Whole time equivalent (WTE)
2. Advanced level practitioner – RECORD NUMBER
  - a. Number of staff headcount
  - b. Whole time equivalent (WTE)
3. Trainee consultant level practitioner – RECORD NUMBER
  - a. Number of staff headcount
  - b. Whole time equivalent (WTE)
4. Consultant level practitioner – RECORD NUMBER
  - a. Number of staff headcount
  - b. Whole time equivalent (WTE)

**ASK IF CODED 1-9 AT Q6 (profession)****LOOP: PLEASE ASK QUESTION FOR EACH PROFESSION SLECTED AT Q6**

**Q22 Of those in your workforce working at advanced clinical practice level, as <<CODE SELECTED AT Q6>> how many are directly employed by you, and how many are employed by someone else?**

**Please record both the actual number of staff and the whole time equivalent. If you are unsure, please give your best estimate.**

1. Employed by you – RECORD NUMBER
  - a. Number of staff headcount
    - i. Don't know
  - b. Whole time equivalent (WTE)
    - i. Don't know
2. Employed by someone else – RECORD NUMBER
  - a. Number of staff headcount
    - i. Don't know
  - b. Whole time equivalent (WTE)
    - i. Don't know

**Supervision**

**The next few questions are about the supervision of staff working at advanced clinical practice level.**

**ASK ALL**

**Q9 Is there a policy or a standard for supervision of staff employed within your practice working at an advanced clinical practice level?**

1. Yes – across all specialties
2. Yes – across some specialities
3. No – no policy or standard for supervision within our practice
4. Don't know

**IF CODED 1 OR 2 AT Q9**

**Q10 Does the policy or standard for supervision within your practice address either of the following areas?**

1. Frequency of supervision

## 18-090780-01 Primary Care Questionnaire 5 – Version 14

2. Set proforma for supervision
3. Neither of these
4. Don't know

**Governance**

The next question is about any processes or governance structures you may have in place.

**ASK ALL**

**Q10B Do you have a process or governance structure in place to support and monitor the impact of your advanced clinical practice level roles?**

1. Yes
2. No
3. Don't know

**Training**

The next few questions are about the training your staff are involved in either locally (i.e. within your practice or CCG) or externally.

**ASK ALL**

**Q11 Do any of your advanced clinical practice level staff receive training locally– e.g. within your practice or CCG?**

**MULTICODE**

1. Yes, training alongside the medical team
2. Yes, profession specific training
3. Yes, speciality specific training
4. Yes, other training, please write in (SPECIFY)
5. No, none of these
6. Don't know

**Q12 Do any of your advanced clinical practice level staff receive training externally – e.g. outside of your practice or CCG?**

1. Yes, Full Masters (including PG cert and PG Dip)
2. Yes, specific modules
3. Yes, Royal College (credential)
4. Yes, credentialing other
5. Yes, other (please write in)
6. No, none of these
7. Don't know

**ASK ALL**

**Q13 What collaboration, if any, does your practice currently have with your local training hub/CEPN/CPEN? E.g. through meetings, attending or providing training courses etc.**

**OPEN ENDED**

1. Meetings
2. Training

## 18-090780-01 Primary Care Questionnaire 5 – Version 14

3. Open contact/access
4. Other
5. We do not have any collaboration with our local training hub
6. Don't know

**ASK ALL**

**Q14 Are practice staff who are working at an advanced clinical level represented at your training hub/CPEN/CEPN meetings?**

**SINGLE CODE**

1. Yes – fully
2. Yes – partly
3. No – hardly at all
4. No – not at all
5. Not applicable – we do not have any training hub meetings
6. Don't know

**Alignment to HEE's Multi-professional framework for advanced clinical practice**

Please think about the staff in your practice, who are working at an advanced clinical level, and how they may align to the multi-professional framework for advanced clinical practice.

**ASK ALL**

**Q15 Which, if any, of the four pillars from the HEE multi-professional framework do you think you will need to provide training on in the near future (e.g. within the next six months) to ensure that your advanced clinical practice level staff comply with the HEE advanced clinical practice framework?**

**MULTICODE**

1. Clinical practice
2. Leadership and Management
3. Education
4. Research
5. None - we will not need to provide any training on these pillars in the near future
6. Don't know

**ASK ALL WHO SELECTED MORE THAN ONE CODE AT Q15 (CODES 1-4)**

**Q16 Which pillar, if any, is your practice's priority to ensure your staff align to the framework?**

**BRING FORWARD LIST FROM Q15**

1. We do not have a priority

**ASK ALL WHO SELECTED CODES 1-4 AT Q16**

**Q17 What plans if any do you have in place to address this training gap?**

**OPEN ENDED**

1. We do not have any plans in place
2. Don't know

**ASK ALL**



18-090780-01 Primary Care Questionnaire 5 – Version 14

**Q18 How many staff, if any, do you currently have in your practice who may be able to move towards an advanced clinical practice level role for each of these specialties? If you are unsure please provide your best estimate.**

1. GP nursing – RECORD NUMBER
  - Don't know
2. Musculoskeletal Services (e.g. physio) – RECORD NUMBER
  - Don't know
3. Paramedic Services – RECORD NUMBER
  - Don't know
4. Other – please write in (SPECIFY) – RECORD NUMBER

**ASK IF CODED 4 AT Q18**

**Q18B You mentioned at the previous question, that you have other staff who may be able to move towards an advanced clinical practice role. For which specialities would this be for?  
OPEN ENDED**

**Q19 What, if any, are the main barriers preventing staff from working towards an advanced clinical practice role?**

1. Support/supervision
2. Time
3. Funding
4. Course/training availability
5. Backfill
6. There are no barriers preventing staff from working towards an advanced clinical practice role
7. Don't know

**Q20 What support, if any, does your practice need to help staff work towards advanced clinical practice roles?**

1. Support/supervision
2. Time
3. Funding
4. Course/training availability
5. Backfill
6. We do not need any support to help staff work toward advanced clinical practice roles
7. Don't know

**Q21 Who invited you to take part in this survey?**

1. Peer/colleague
2. Manager/team lead
3. Professional lead
4. Organisational lead
5. Other
6. Don't know/can't remember

**RECONTACT QUESTION**

## 18-090780-01 Primary Care Questionnaire 5 – Version 14

Health Education England or an agency working on behalf of HEE (such as Ipsos MORI) may want to get in contact with those who have responded to this survey for the purpose of inviting them to take part in follow up research as part of this project within the next 12 months.

If you are willing to be contacted as part of this project we will need to collect some contact details. All details provided will be treated in the strictest confidence, held only for 12 months by HEE, and will only be used to invite you to take part in further research as part of this project.

Are you willing to provide your contact details to HEE so that they, or an agency working on their behalf, can contact you within the next 12 months for this purpose?

1. Yes – COLLECT CONTACT DETAILS – NAME & EMAIL ADDRESS.
2. No
